# Supplementary material for: Investigating the Relationship between Fire Severity and Post-Fire Vegetation Regeneration and Subsequent Fire Vulnerability
Source: MDPI journal article supplement (doi:10.3390/f14020222), 2023-01-24
Supplement: s1 [file s1]

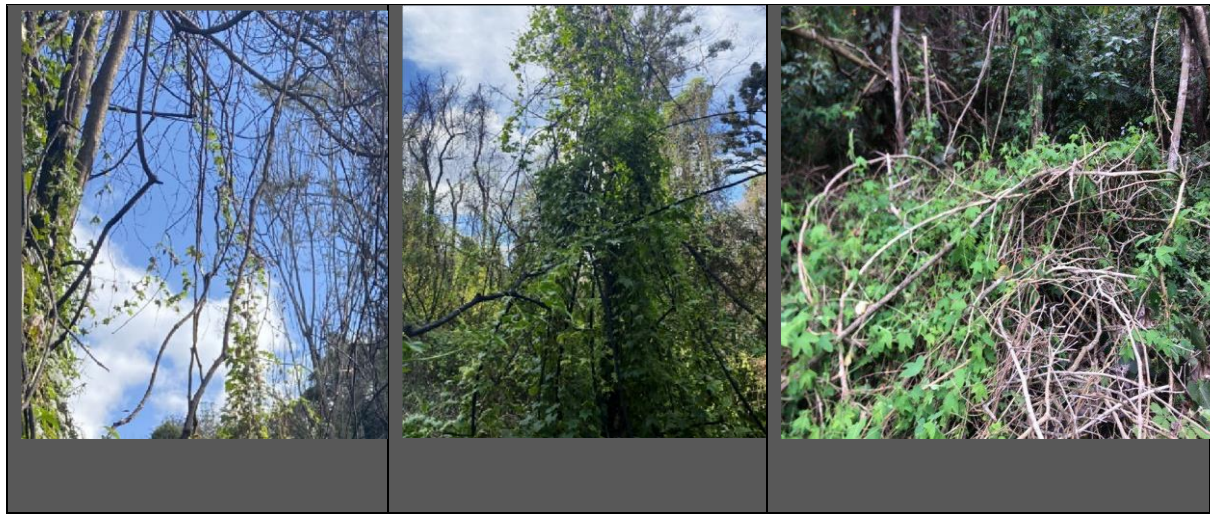

**Figure S1.** Photographs captured in the field to assist identification of vine presence and abundance and disturbance across all National Parks. Top; The (left) displays few vines considered less than 1 tower, the (middle) shows a cluster of vines grouped into a tower and the (right) shows a clump of vines which were identified both in the canopy and on the ground level. Bottom; The (left) displays branches dispersed on the forest floor, the (middle) shows an example of logs burnt down from a tree and (right) shows a tree fall identified at most burnt locations.

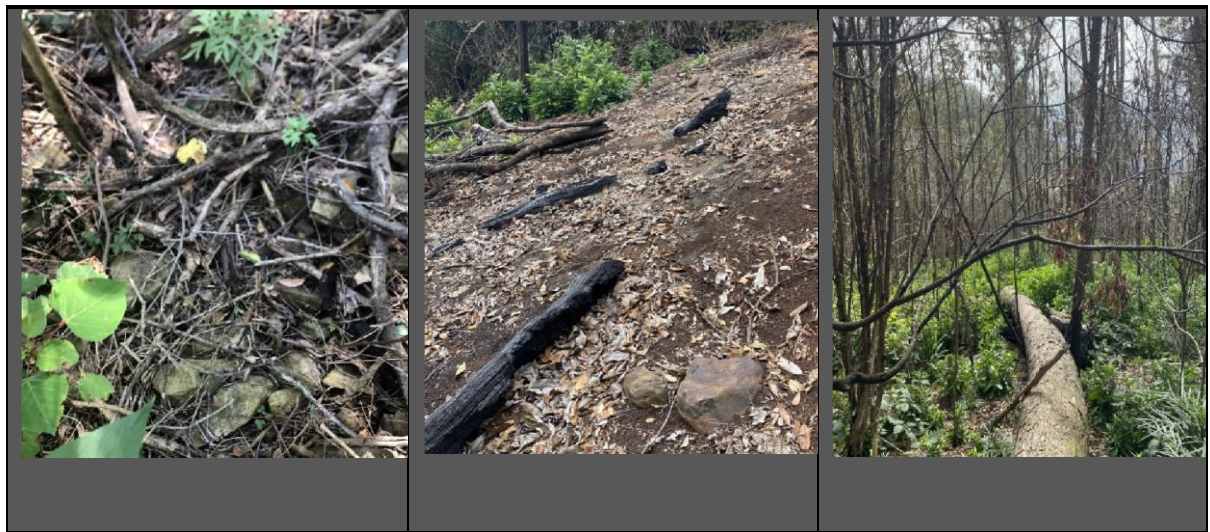

**Figure S2.** Disturbance map of Main Range NP displaying 2012 clearings data, rainforest.

polygon, site locations and disturbance points.

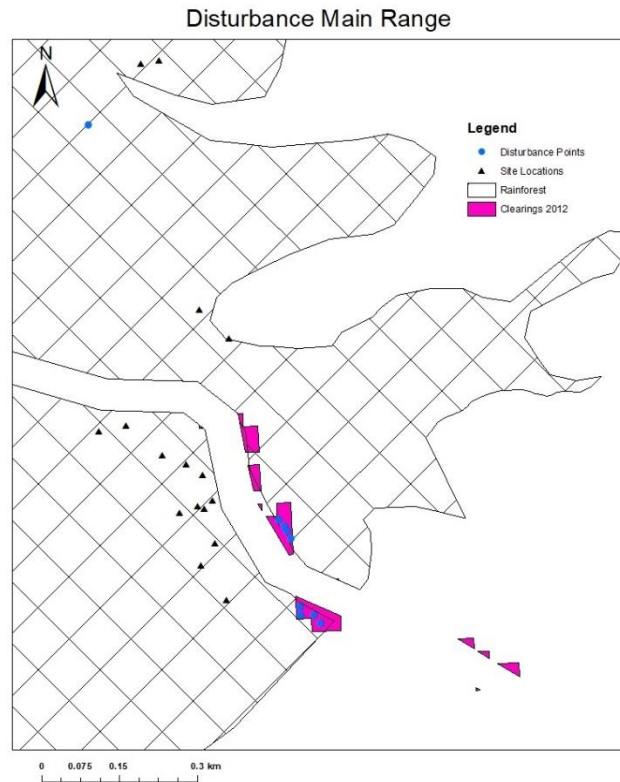

**Figure S3.** Fire severity (dNBR) mapping of all Bulburin National Park.

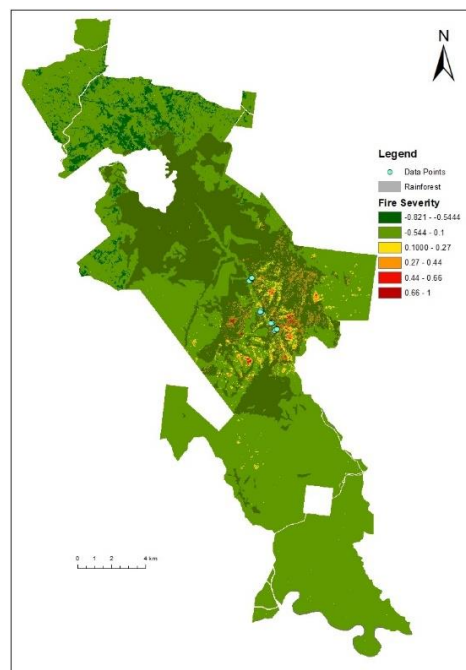

**Figure S4.** Fire severity mapping at Main range national park.

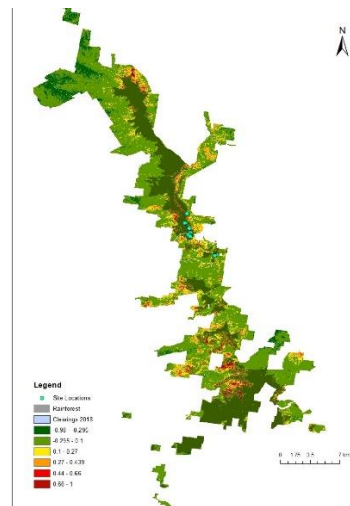

**Figure S5.** Fire severity mapping at Lamington National Park.
