# Supplementary material for: Investigating the Relationship between Fire Severity and Post-Fire Vegetation Regeneration and Subsequent Fire Vulnerability
Source: MDPI journal article supplement (doi:10.3390/f14020222), 2023-01-24
Supplement: s1 [file s1]

Archive with 1 entries (1 files):
- forests-2186888-supplementary.pdf
